# Supplementary material for: Bacterial Lysate from the Multi-Strain Probiotic SLAB51 Triggers Adaptative Responses to Hypoxia in Human Caco-2 Intestinal Epithelial Cells under Normoxic Conditions and Attenuates LPS-Induced Inflammatory Response
Source: MDPI journal article supplement (doi:10.3390/ijms24098134), 2023-05-02
Supplement: s1 [file s1]

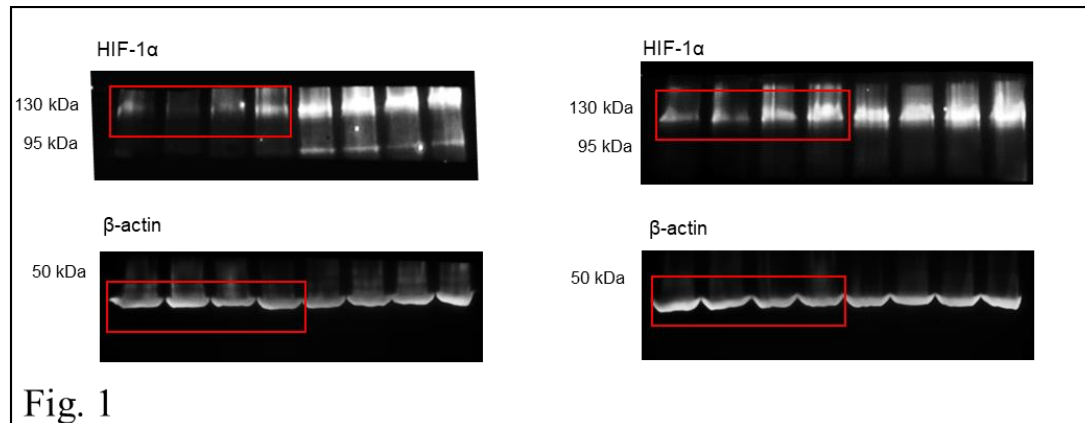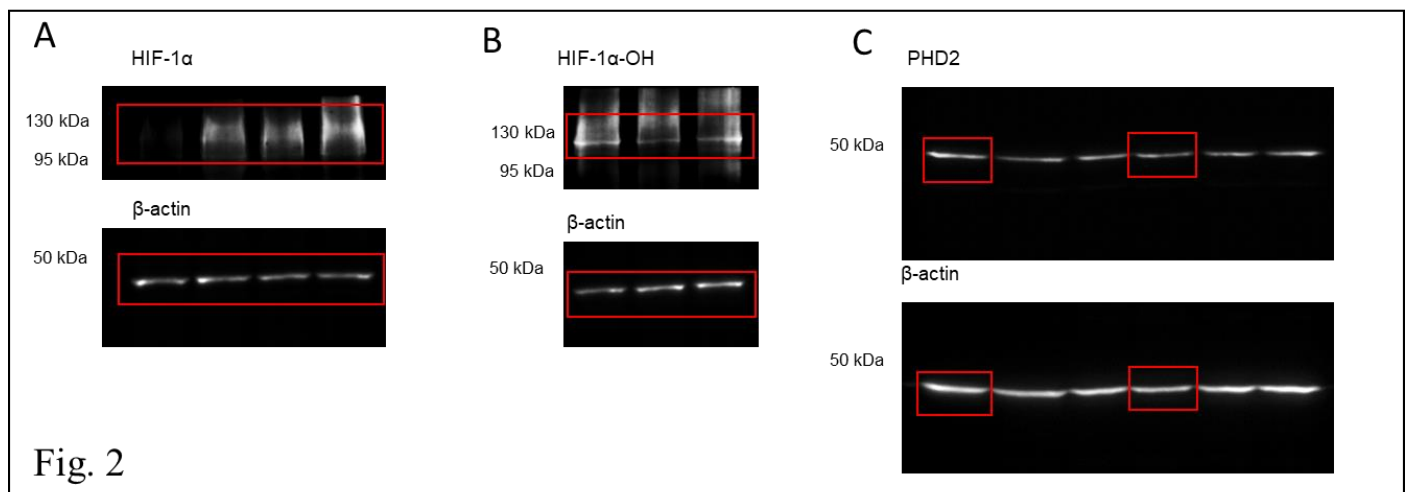

**Supplementary Figure 1.** Uncropped Western blot images from the blots shown in Figure 1 and 2. The red boxes outline the areas presented in the figures.

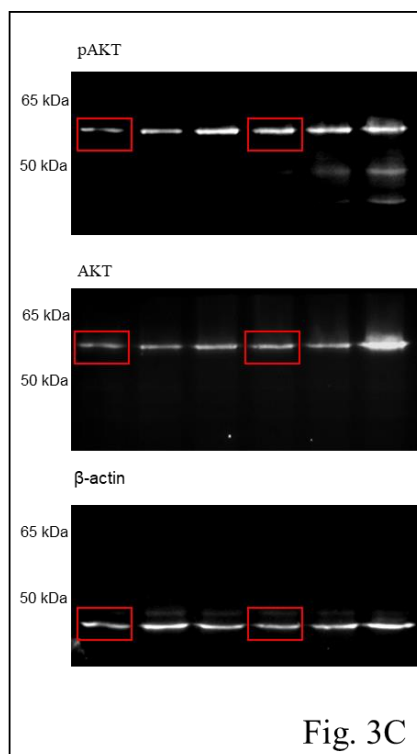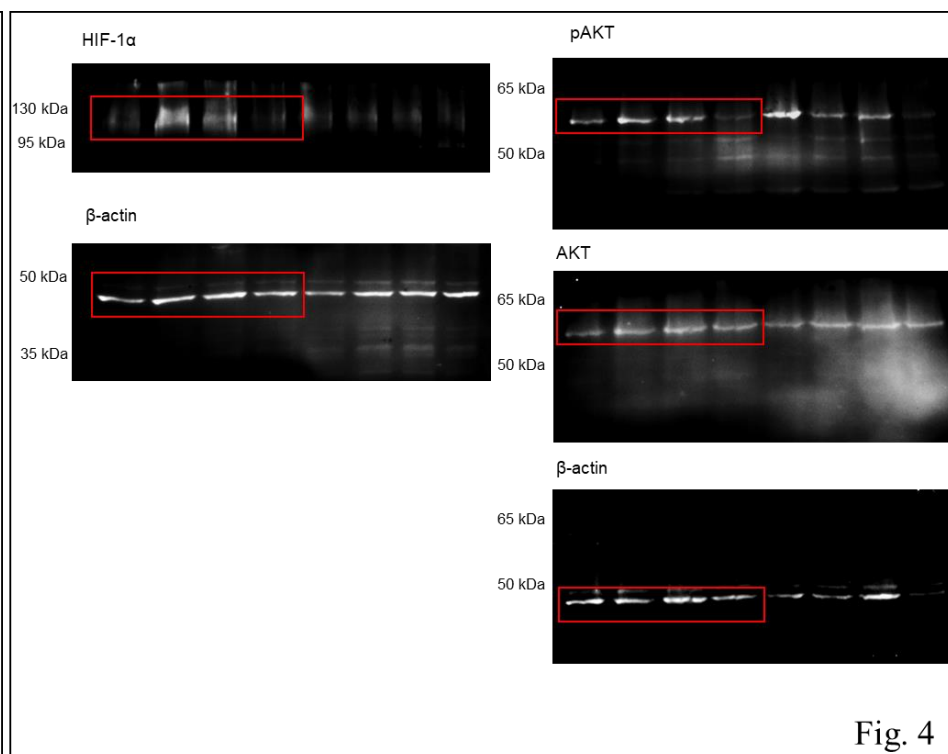

**Supplementary Figure 2.** Uncropped Western blot images from the blots shown in Figure 3 and 4. The red boxes outline the areas presented in the figures.

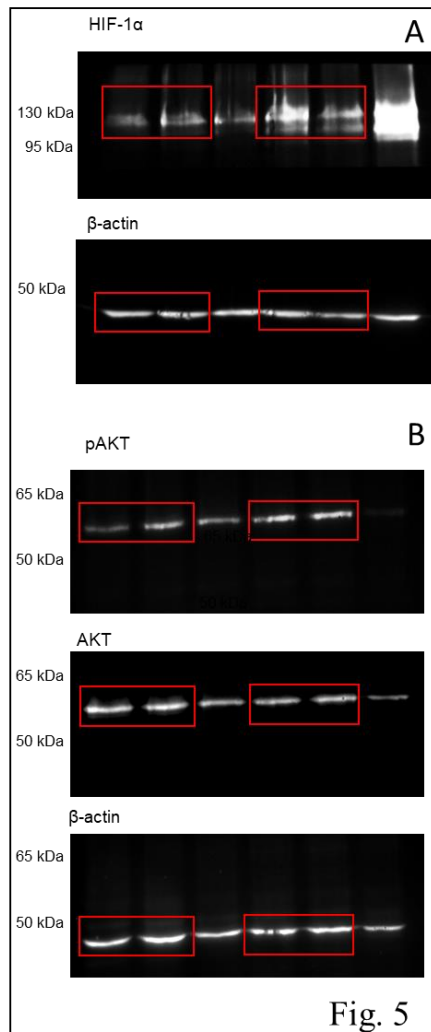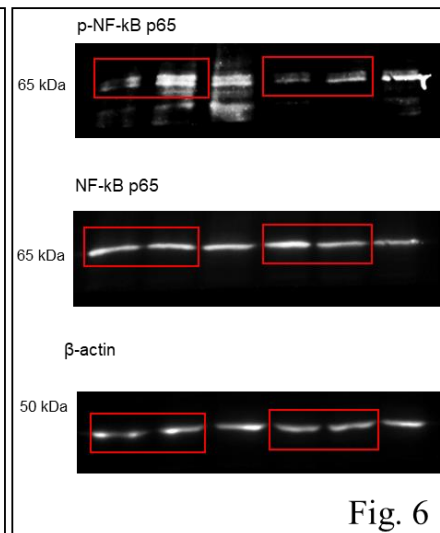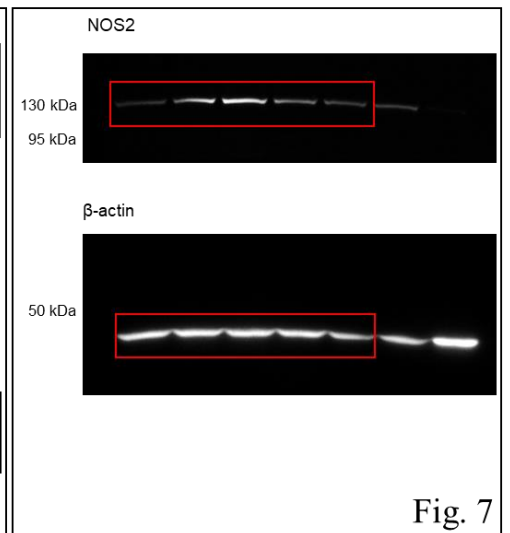

**Supplementary Figure 3.** Uncropped Western blot images from the blots shown in Figure 5, 6, and 7. The red boxes outline the areas presented in the figures.
